# Supplementary material for: The selective production of jet fuel range alkanes via the catalytic upgrading of palmitic acid over Co/HMCM-49 catalysts
Source: Royal Society of Chemistry journal article supplement (doi:10.1039/c9cc04503a), 2019-01-01
Supplement: c9cc04503a1.pdf [file c9cc04503a1.pdf]

## **Catalytic upgrading of palmitic acid to jet fuel range alkanes over Co/H-MCM-49 bi-functional catalysts**

Yanchun Shi,<sup>a</sup> Rui Li,<sup>b</sup> Qingru Shen,<sup>b</sup> Mingde Yang,<sup>a</sup> Yulong Wu<sup>\*a</sup>

- a) Institute of Nuclear and New Energy Technology, Laboratory of Advanced Reactor Engineering and Safety of Ministry of Education, Tsinghua University, Beijing 100084 (P. R. China)
- b) MOE Engineering Research Center of Forestry Biomass Materials and Bioenergy, Beijing Forestry University, Beijing, 100083 (P. R. China)

\* Corresponding authors:

Prof. Yulong Wu

Address: Institute of Nuclear and New Energy Technology, Tsinghua University,  
Beijing 100084, PR China

Tel: + 86 010-89796163; Fax: + 86 10-69771464

E-mail: [wylong@tsinghua.edu.cn](mailto:wylong@tsinghua.edu.cn) (Y. L. Wu)

## Experiments

Catalysts preparation: HMCM-49 zeolite ( $\text{SiO}_2/\text{Al}_2\text{O}_3 = 25$ , Sinopec Research Institute of Petroleum Processing, Beijing, China) was named as HM-49. As-synthesized MCM-49 zeolite were post-synthesized by tetraethylammonium hydroxide (TEAOH) to tailor texture property and acidity,<sup>1</sup> named as HMP-49. Co/HM-49 and Co/HMP-49 were prepared via the solid state impregnation method (& the melt infiltration method) with 5 wt% loading  $\text{CoO}$ .<sup>2,3</sup> Additionally, TG curve of  $\text{Co}(\text{NO}_3)_2 \cdot 6\text{H}_2\text{O}$  was shown in Fig. S2, and it can be seen that the complete decomposition of  $\text{Co}(\text{NO}_3)_2 \cdot 6\text{H}_2\text{O}$  occurred before 300 °C.  $\text{Co}(\text{NO}_3)_2 \cdot 6\text{H}_2\text{O}$  (m.p. 55-56 °C, Guangfu Fine Chemical Research Institute, Tianjin, China) was mixed uniformly with HM-49/HMP-49 in a closed vital at 65 °C for 24 h, and molten metal salts could be penetrated into HM-49/HMP-49 pores, supercages and 12 MR cups through capillary forces. After dried at 105 °C overnight, calcined at 550 °C for 5 h in air atmosphere and finally reduced at 500 °C for 4 h (ramp: 10 °C · min<sup>-1</sup>) in hydrogen flow (flow rate: 80 mL · min<sup>-1</sup>), Co/HM-49 and Co/HMP-49 bi-functional catalysts were obtained. Thus the complete decomposition of  $\text{Co}(\text{NO}_3)_2 \cdot 6\text{H}_2\text{O}$  occurred during calcination. During the solid state impregnation process, no extra water could avoid the adsorption between  $\text{H}_2\text{O}$  and  $\text{Co}(\text{NO}_3)_2$  over HM-49/HMP-49 supports, which would be beneficial for Co species dispersion.

Catalysts characterization: XRD patterns of samples were performed with the scanning range of  $2\theta$  was 5 - 80° on a D/MAX-III X-ray diffractometer (Rigaku Corporation, Japan), which was filtered Cu K  $\alpha$  radiation at a tube current of 35 mA and a voltage of 35 kV. The relative crystallinity (R. C.) of HM-49, Co/HM-49 and Co/HMP-49 were based upon the sum of the peak intensities at  $2\theta$  of 14.4°, 22.0°,

22.7°, 23.8° and 26.0° (Fig. S1), and the crystallinity of HM-49 was defined as 100%. Porosity of catalysts was collected via the nitrogen adsorption-desorption isotherms on the Micromeritics ASAP 2010 instrument. According to the BET equation using the relative pressure range of 0.05 - 0.16 in the nitrogen adsorption isotherm as range of linearity (using a molecular cross-sectional area for N<sub>2</sub> of 0.162 nm<sup>2</sup>), the total surface area was calculated. Based upon the t-plot method, the micropore volume was obtained. TEM characterized the crystal morphology. NH<sub>3</sub>-TPD was carried out on an Autochem II 2920 unit equipped with a thermal conductivity detector to characterize the acidity of bi-functional catalysts. H<sub>2</sub>-TPR was performed at a rate of 5 °C/min from room temperature up to 600 °C in a flow of 5% H<sub>2</sub>/N<sub>2</sub> on a TP-5076 multiple adsorption instrument.

Catalytic HDO tests: In our previous works,<sup>4-8</sup> the best conditions to ensure complete deoxygenation of palmitic acid were considered at 260 °C in presence of 4 MPa H<sub>2</sub> for 4 h, which were chosen in this paper. The typical reaction was introduced as follows: palmitic acid (0.5 g), decalin/decane (50 mL), and bi-functional catalysts (0.1 g) were mixed into the autoclave (100 mL) by batch mode. H<sub>2</sub> at ambient temperature was purged into the autoclave for several times to drive away air, and then regulated to 4 MPa H<sub>2</sub>. Heating to reaction temperature (260 °C), and then reacting for 4 h at 300 rpm stirring. After reaction, the autoclave cooled to ambient temperature, and the pressure decreased. The final liquid products were analyzed on the Agilent GC-MS (7890-597-5) with a FSFS J & W 122-5532 (30 m × 250 μm × 0.25 μm) column and a flame ionization detector. Conversion of palmitic acid and selectivity of products were calculated:

*Conversion of palmitic acid* = (moles of converted palmitic acid/ mole of the starting palmitic acid) × 100%.

*Selectivity of products = (moles of each product/ moles of total products) × 100%.*

## References

- [1] Y. C. Shi, E. H. Xing, W. H. Xie, F. M. Zhang, X. H. Mu and X. T. Shu, *Appl. Catal. A: Gen.*, **2015**, 497, 135-144.
- [2] F. S. Xiao, S. Zheng, J. M. Sun, R. B. Yu, S. L. Qiu and R. R. Xu, *J. Catal.*, **1998**, 176, 474-487.
- [3] X. B. Li, X. Y. Quek, D. A. J. M. Ligthart, M. L. Guo, Y. Zhang, C. Li, Q. H. Yang and E. J. M. Hensen, *Appl. Catal. B: Environ.*, **2012**, 123-124, 424-432.
- [4] Y. C. Shi,; E. H. Xing,; Y. Y. Cao,; M. J. Liu,; K. J. Wu,; M. D. Yang and Y. L. Wu, *Chem. Eng. Sci.*, **2017**, 166, 262-273.
- [5] Y. Y. Cao, Y. C. Shi, J. M. Liang, Y. L. Wu, S. B. Huang, J. L. Wang, M. D. Yang and H. S. Hu, *Chem. Eng. Sci.*, **2017**, 158, 188-195.
- [6] M. J. Liu, Y. C. Shi, Y. F. Bi, E. H. Xing, Y. L. Wu, S. B. Huang and M. D. Yang, *Energy Technol.*, **2018**, 6, 406-415.
- [7] Y. C. Shi, Y. Y. Cao, Y. N. Duan, H. Chen, Y. Chen, M. D. Yang and Y. L. Wu, *Green. Chem.*, **2016**, 18, 4633-4648.
- [8] Y. Y. Cao, Y. C. Shi, Y. F. Bi, K. J. Wu, S. J. Hu, Y. L. Wu and S. B. Huang, *Fuel Process Technol.*, **2018**, 72, 29-35.
- [9] Y. C. Shi, E. H. Xing, Y. Y. Cao, M. J. Liu, K. J. Wu, M. D. Yang and Y. L. Wu, *Chem. Eng. Sci.*, **2017**, 166, 262-273.

**Figure captions:**

**Fig. S1** Standard XRD patterns of compared samples (a: standard XRD patterns of Co species; b: standard XRD pattern of as-synthesized MCM-22P) and XRD patterns of HM-49, Co/HM-49 and Co/HMP-49 catalysts (c)

**Fig. S2** TG curve of  $\text{Co}(\text{NO}_3)_2 \cdot 6\text{H}_2\text{O}$  sample

**Fig. S3**  $\text{N}_2$  adsorption-desorption curves of HM-49 and post-synthesized HMP-49 zeolites

**Fig. S4** SEM images of HM-49 and HMP-49 parent zeolites

**Fig. S5**  $\text{H}_2$ -TPR curves of Co/HZ-22 and Co/HZ-5 precursors (ref. 19 and ref. 27)

**Fig. S6** XPS curve of Co/HM-49 and Co/HMP-49 bi-functional catalysts

**Fig. S7**  $\text{NH}_3$ -TPD curves of Co/HZ-22 and Co/HZ-5 catalysts (ref. 19 and ref. 27)

**Fig. S8** GC-MS spectra of palmitic acid conversion over Co/HM-49 and Co/HMP-49 bi-functional catalysts at 260 °C in presence of 4 MPa  $\text{H}_2$  for 4 h

**Table S1** Freezing points of some normal and isomethyl paraffins of various carbon numbers

**Table S2** Textural properties of zeolitic supports and Co/zeolite bi-functional catalysts

**Table S3** Acid properties of H-type zeolites by pyridine-FTIR analysis

**Table S4** Comparison of catalytic performance over Co/zeolite bi-functional catalysts at 260 °C in presence of 4 MPa  $\text{H}_2$  for 4 h

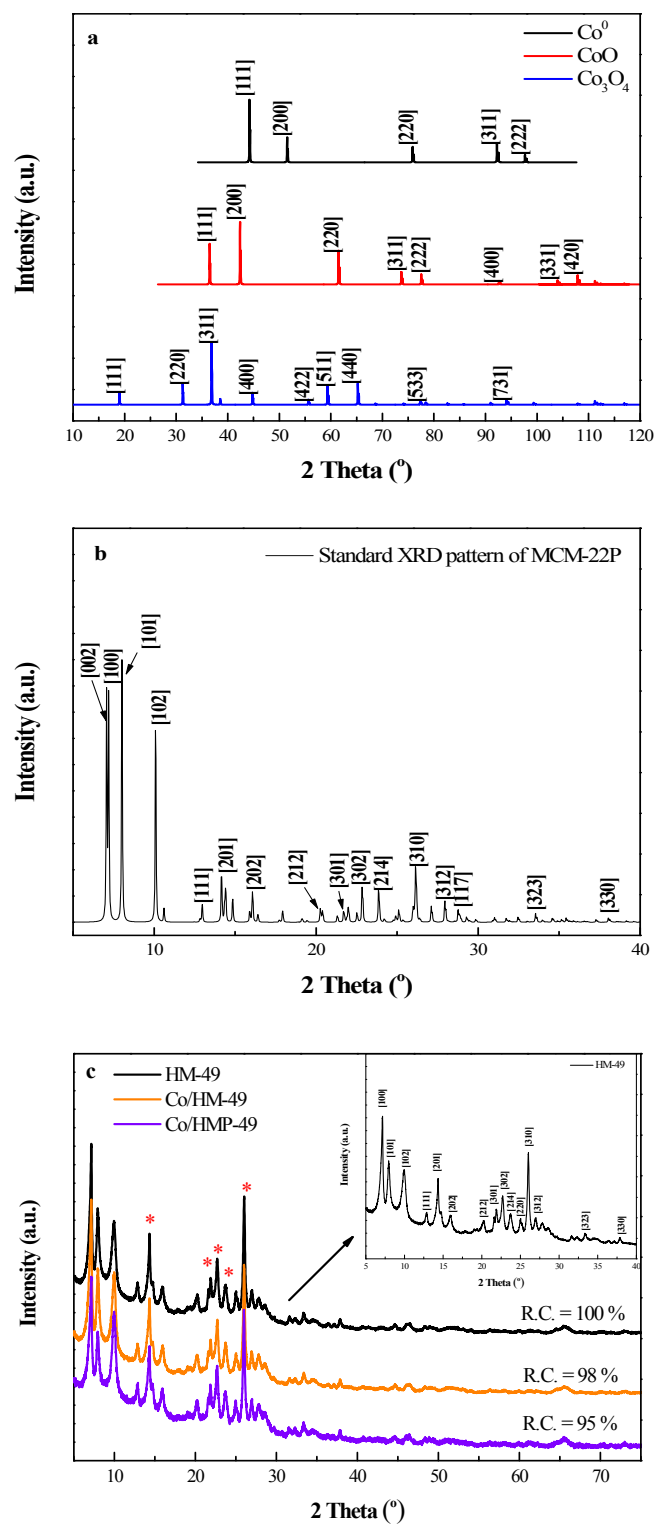

Fig. S1 Standard XRD patterns of compared samples (a: standard XRD patterns of Co species; b: standard XRD pattern of as-synthesized MCM-22P) and XRD patterns of HM-49, Co/HM-49 and Co/HMP-49 catalysts (c)

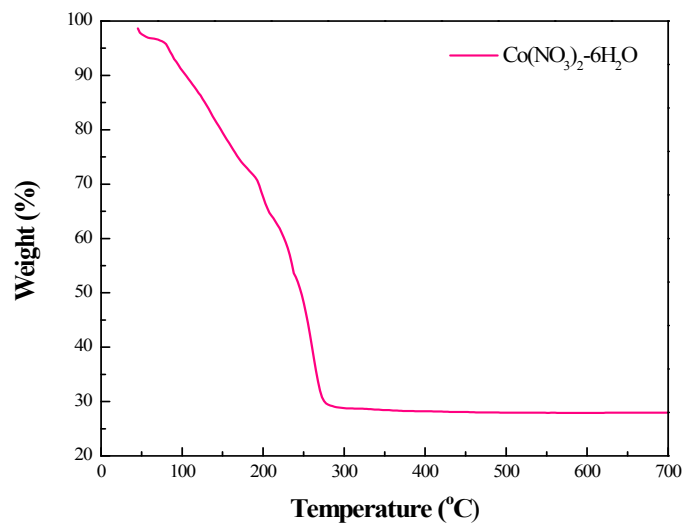

Fig. S2 TG curve of  $\text{Co}(\text{NO}_3)_2 \cdot 6\text{H}_2\text{O}$  sample

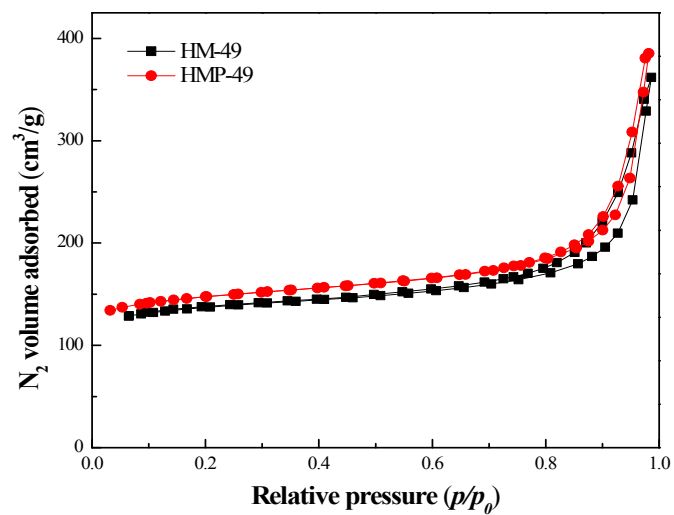

Fig. S3 N<sub>2</sub> adsorption-desorption curves of HM-49 and post-synthesized HMP-49 zeolites (like of the cases in ref. 21)



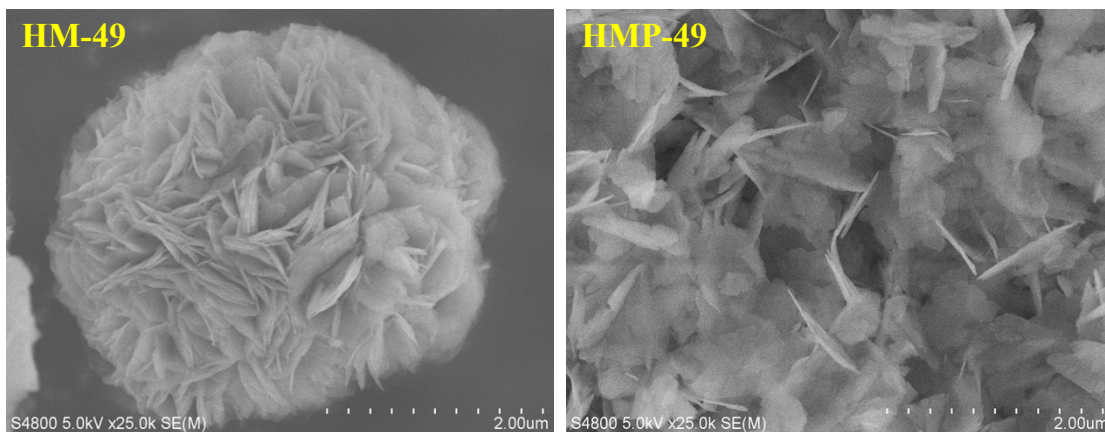

Fig. S4 SEM images of HM-49 and HMP-49 parent zeolites (like of the cases in ref. 21)

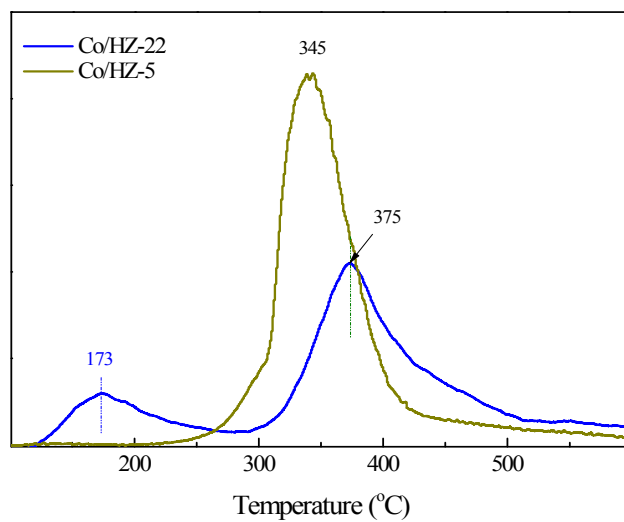

Fig. S5 H<sub>2</sub>-TPR curves of Co/HZ-22 and Co/HZ-5 precursors (ref. 19 and 27)

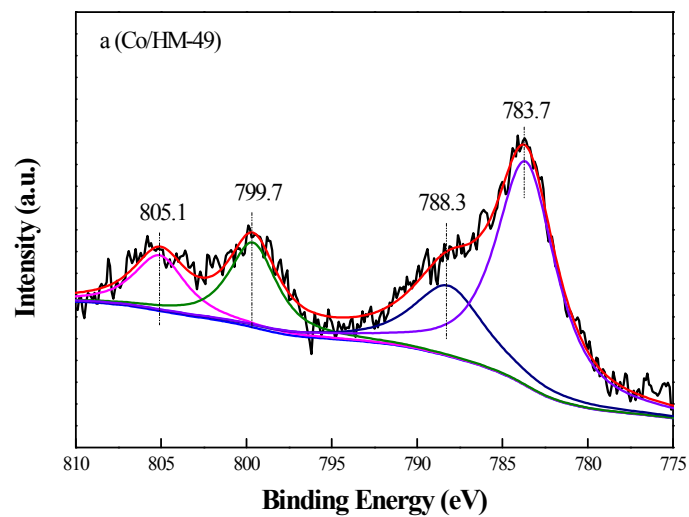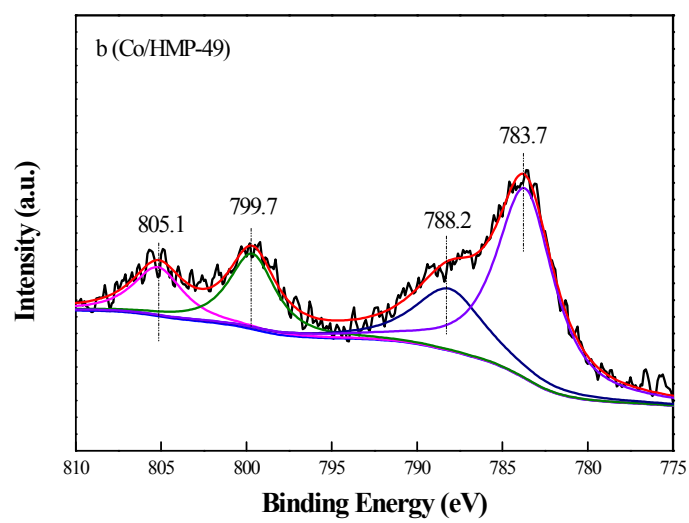

Fig. S6 XPS curve of Co/HM-49 (a) and Co/HMP-49 (b) bi-functional catalysts

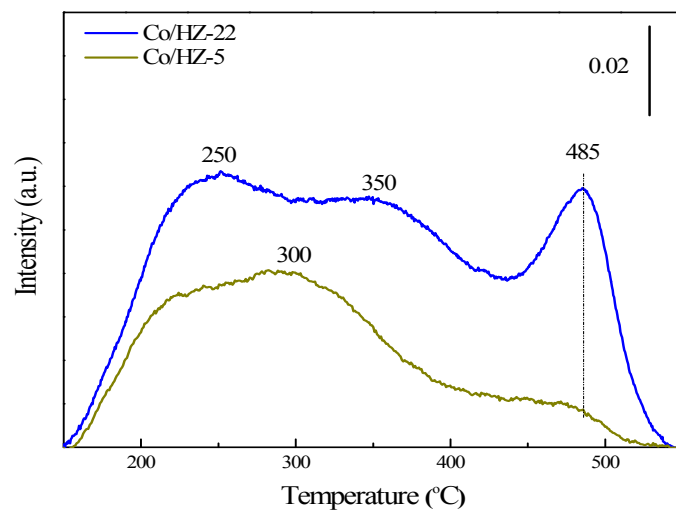

Fig. S7 NH<sub>3</sub>-TPD curves of Co/HZ-22 and Co/HZ-5 catalysts (ref. 19 and 27)

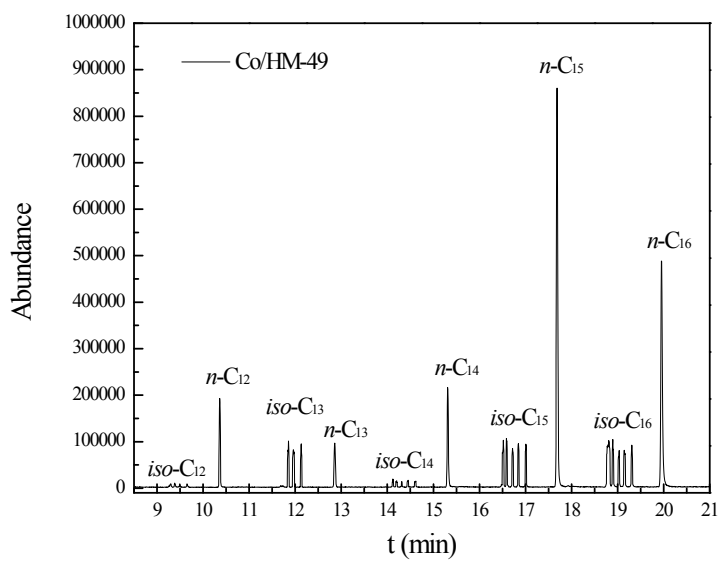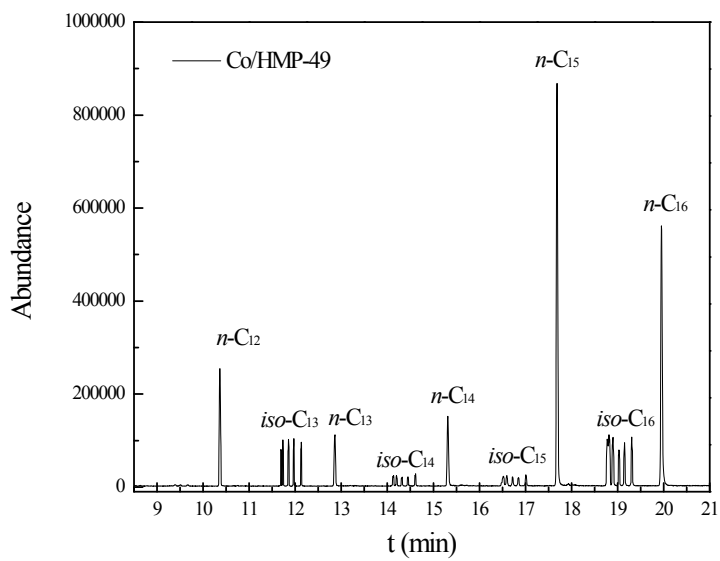

Fig. S8 GC-MS spectra of palmitic acid conversion over Co/HM-49 and Co/HMP-49 bi-functional catalysts at 260 °C in presence of 4 MPa H<sub>2</sub> for 4 h

Table S1 Freezing points of some normal and isomethyl paraffins of various carbon numbers  
(modified from ref. 8)

| Carbon Number | Freezing Point, °C |                  |                  |
|---------------|--------------------|------------------|------------------|
|               | <i>n</i> -Paraffin | 2-Methylparaffin | 5-Methylparaffin |
| C12           | -10                | -46              | -70              |
| C13           | -5                 | -26              | -69              |
| C16           | 18                 | -10              | -31              |

Table S2 Textural properties of zeolitic supports and Co/zeolite bi-functional catalysts

| Samples              | Si/ Al<br>(XRF) | Co/Si<br>(XRF) | Co/Si<br>(XRF) | S <sub>BET</sub><br>(m <sup>2</sup> /g) | S <sub>micro</sub><br>(m <sup>2</sup> /g) | S <sub>ext</sub><br>(m <sup>2</sup> /g) | V <sub>micro</sub><br>(cm <sup>3</sup> /g) | V <sub>total</sub><br>(cm <sup>3</sup> /g) |
|----------------------|-----------------|----------------|----------------|-----------------------------------------|-------------------------------------------|-----------------------------------------|--------------------------------------------|--------------------------------------------|
| HM-49                | 12              | /              | /              | 476                                     | 394                                       | 82                                      | 0.18                                       | 0.56                                       |
| Co/HM-49             | 12              | 0.0436         | 0.0244         | 427                                     | 355                                       | 72                                      | 0.16                                       | 0.52                                       |
| HMP-49               | 10              | /              | /              | 507                                     | 409                                       | 98                                      | 0.18                                       | 0.63                                       |
| Co/HMP-49            | 10              | 0.0441         | 0.0239         | 428                                     | 342                                       | 86                                      | 0.16                                       | 0.57                                       |
| Co/HZ-22<br>[ref. 8] | 36              | /              | /              | 131                                     | 94                                        | 37                                      | 0.04                                       | 0.31                                       |
| Co/HZ-5<br>[ref. 9]  | 112             | /              | /              | 385                                     | 355                                       | 30                                      | 0.17                                       | 0.23                                       |

Table S3 Acid properties of H-type zeolites by pyridine-FTIR analysis  
(modified from ref. 19)

| <b>Samples</b>  | <b>200 °C</b>                                       |                                                        | <b>350 °C</b>                                       |                                                        |
|-----------------|-----------------------------------------------------|--------------------------------------------------------|-----------------------------------------------------|--------------------------------------------------------|
|                 | Lewis acid<br>( $\mu\text{mol}\cdot\text{g}^{-1}$ ) | Brönsted acid<br>( $\mu\text{mol}\cdot\text{g}^{-1}$ ) | Lewis acid<br>( $\mu\text{mol}\cdot\text{g}^{-1}$ ) | Brönsted acid<br>( $\mu\text{mol}\cdot\text{g}^{-1}$ ) |
| HM-49           | 180                                                 | 412                                                    | 155                                                 | 387                                                    |
| HMP-49          | 307                                                 | 538                                                    | 231                                                 | 486                                                    |
| HZ-22 [ref. 19] | 62                                                  | 214                                                    | 48                                                  | 200                                                    |



Table S4 Comparison of catalytic performance over Co/zeolite bi-functional catalysts at 260 °C in presence of 4 MPa H<sub>2</sub> for 4 h

(a: *n*-decane one run; b: *n*-decane five runs; c: decalin one run)

| Catalysts              | Con.<br>(%) | Selectivity (%) of each alkanes |                               |                               |                               |                               |                               |      |     | <i>iso/n</i> -<br>(mol/mol) | Cracking<br>selectivity<br>(C <sub>12</sub> - C <sub>14</sub> ) | Ref.<br>(%) |
|------------------------|-------------|---------------------------------|-------------------------------|-------------------------------|-------------------------------|-------------------------------|-------------------------------|------|-----|-----------------------------|-----------------------------------------------------------------|-------------|
|                        |             | alkanes                         | <i>iso/n</i> -C <sub>12</sub> | <i>iso/n</i> -C <sub>13</sub> | <i>iso/n</i> -C <sub>14</sub> | <i>iso/n</i> -C <sub>15</sub> | <i>iso/n</i> -C <sub>16</sub> | -CHO | -OH |                             |                                                                 |             |
| Co/HM-49 <sup>a</sup>  | > 99.9      | 100                             | 1.0/5.4                       | 8.7/3.3                       | 2.1/5.8                       | 12.0/26.9                     | 17.8/17.0                     | -    | -   | 0.7                         | 26.3                                                            | -           |
| Co/HMP-49 <sup>a</sup> | > 99.9      | 100                             | 0/8.2                         | 9.0/3.7                       | 3.0/5.4                       | 3.2/29.4                      | 19.1/19.0                     | -    | -   | 0.5                         | 29.3                                                            | -           |
| Co/HMP-49 <sup>b</sup> | > 99.9      | 100                             | -/5.0                         | 6.3/2.5                       | 4.8/3.4                       | 9.8/30.2                      | 15.0/24.0                     | -    | -   | 0.4                         | 24.0                                                            | -           |
| Co/HMP-49 <sup>c</sup> | > 99.9      | 100                             | -/5.4                         | 11.7/2.8                      | 4.8/3.8                       | 4.9/33.1                      | 10.4/23.1                     | -    | -   | 0.5                         | 26.9                                                            | -           |
| Co/HZ-22               | > 99.9      | 100                             | -/-                           | -/-                           | -/0.9                         | 9.3/15.4                      | 43.6/30.8                     | -    | -   | 1.1                         | 0.9                                                             | 8           |
| Co/HZ-5                | > 99.9      | 100                             | -/-                           | -/-                           | -/3.6                         | 4.5/17.5                      | 24.9/49.5                     | -    | -   | 0.4                         | 3.6                                                             | 9           |
